# Supplementary material
Source: Research Square preprint supplement (doi:10.21203/rs.3.rs-9851640/v1)
Supplement: Supplementary file 1 [file 9d4340a62f86082d4277221f.docx]

**Patient Questionnaire for Outpatients**

Please circle the most appropriate answer for each question.
(Example: Q1. What is your sex? ① Male ② Female ③ Other / Prefer not to answer)

**In this study, the term “COVID-19 pandemic period (hereafter referred to as the pandemic)” refers to the period from January 2020 to December 2022.**
**The term “pandemic” is defined as a worldwide outbreak of an infectious disease and mainly refers to the COVID-19 pandemic in this questionnaire.**

**Basic Information**

**Q0. What is your age group?
① 20–29 years
② 30–39 years
③ 40–49 years
④ 50–59 years
⑤ 60–69 years
⑥ 70–79 years
⑦ 80 years or older**

**Q1. What is your sex?
① Male
② Female
③ Other / Prefer not to answer**

**Q2. What is your main reason for visiting the hospital? (Multiple answers allowed)
① Hypertension
② Diabetes mellitus
③ Dyslipidemia
④ Insomnia
⑤ Orthopedic disease
⑥ Mental disorder (e.g., depression, schizophrenia)
⑦ Other (please specify): __________**

**Q3. What type of residence do you currently live in?
① Detached house
② Apartment / Condominium
③ Nursing home or residential care facility
④ Other (please specify): __________**

**Q4. Do you live with family members?
① Living alone
② Living with family**

**Q5. Are you currently working?
① Employed (including full-time or part-time work)
② Not employed
③ Other**

**Changes in Daily Activities During the Pandemic**

**Q6. Did your frequency of out-of-home activity change during the pandemic?
① Decreased significantly
② Decreased slightly
③ No change
④ Increased slightly
⑤ Increased significantly**

**Q7. Did your frequency of social interaction with others change during the pandemic?
① Decreased significantly
② Decreased slightly
③ No change
④ Increased slightly
⑤ Increased significantly**

**Psychological and Health Effects**

**Q8. Did you experience insomnia during the pandemic?
① Very often
② Sometimes
③ Rarely
④ Not at all
⑤ Do not remember**

**Q9. Did you feel depressed or low in mood during the pandemic?
① Very often
② Sometimes
③ Rarely
④ Not at all
⑤ Do not remember**

**Q10. Did you refrain from visiting medical institutions or undergoing health checkups during the pandemic?
① Frequently refrained
② Occasionally refrained
③ Did not refrain**

**Q11. Since the beginning of the pandemic, have you experienced a fall or fracture? (Multiple answers allowed)
① Fell but did not fracture
② Sustained a fracture (site: a. femur / b. wrist / c. rib / d. other)
③ Neither fall nor fracture**

**Changes in Lifestyle Habits**

**Q12. How did your body weight change during the pandemic?
① Increased
② Slightly increased
③ No change
④ Slightly decreased
⑤ Decreased**

**Q13. How did your level of physical activity change during the pandemic?
① Decreased significantly
② Decreased slightly
③ No change
④ Increased slightly
⑤ Increased significantly**

**Q14. Overall, how did your diet, sleep, and lifestyle habits change during the pandemic?
① Worsened significantly
② Worsened slightly
③ No change
④ Improved slightly
⑤ Improved significantly**

**Q15. How did your use of eating out or ready-made meals (restaurants, supermarket or convenience store meals) change during the pandemic compared with before?
① Increased
② Did not change much
③ Decreased
④ Did not use these services even before the pandemic**

**Community Support and Future Preparedness**

**Q16. What types of support would you like medical institutions to provide during a future pandemic? (Multiple answers allowed)
① Telephone or online consultations
② Flexible prescription services
③ Community-based activities for exercise and health maintenance
④ Provision of infection prevention information
⑤ Other (please specify): __________**

**Q17. Were there any community initiatives during the pandemic that you found helpful?
(Examples: meal delivery services, telephone consultations, community newsletters)
Free-text response: ______________________________**

**Q18. What kinds of preparations do you think are necessary for communities, local governments, and medical institutions to better respond to a future pandemic?
Free-text response: ______________________________**

**Thank you very much for your cooperation.**
